# Supplementary material for: User preferences for privacy features in digital assistants
Source: Springer Nature journal article supplement (doi:10.1007/s12525-020-00447-y), 2020-11-30

# Online Survey

- Link and screenshots -

The online survey is available in German language via the following link:

<http://www.dise.sandbox.whu.edu/dise-online/o/Survey.aspx?id=15699&pos=0&user=000000-2b8ce607-3d28-42ae-9c4c-858d242f17c6>

It represents the original survey and introduction video offered to the participants. Each user had a unique identifier. Further, user's browser version, OS, screen resolution and exact time of accessing the survey was tracked. The full data set is also available as an appendix.

As our CBC aims to examine the German internet population, the original survey was offered in German language only. To offer the insights also to an international audience, we made screenshots each page and translated them into English language using [DeepL](#). Thus, the layout might have changed a little. Further, we do not claim for correct translation.

You can find the translated screenshots on the following pages.

# Survey

Fortschritt  0%

## Welcome to our study!

We are very pleased that you would like to participate in our survey. Your information will be treated in strict confidence. The survey will take about 20 minutes in total. The survey is about a "personal digital assistant" that could be used in the future to network personal devices and objects and to provide its users with novel services and applications.

To give you an impression of the personal assistant, we will start by showing you a video and several application areas of the product. Afterwards we will ask you some questions about the personal assistant. When answering the questions, there are neither wrong nor right answers.

Thank you very much for your support!

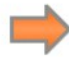

## Survey

Fortschritt 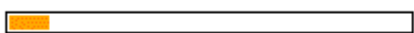 10%

You can start the video by pressing the "Play" button. Please note that by playing the video you automatically agree to keep the content of the video or excerpts thereof confidential and not to distribute it to third parties.

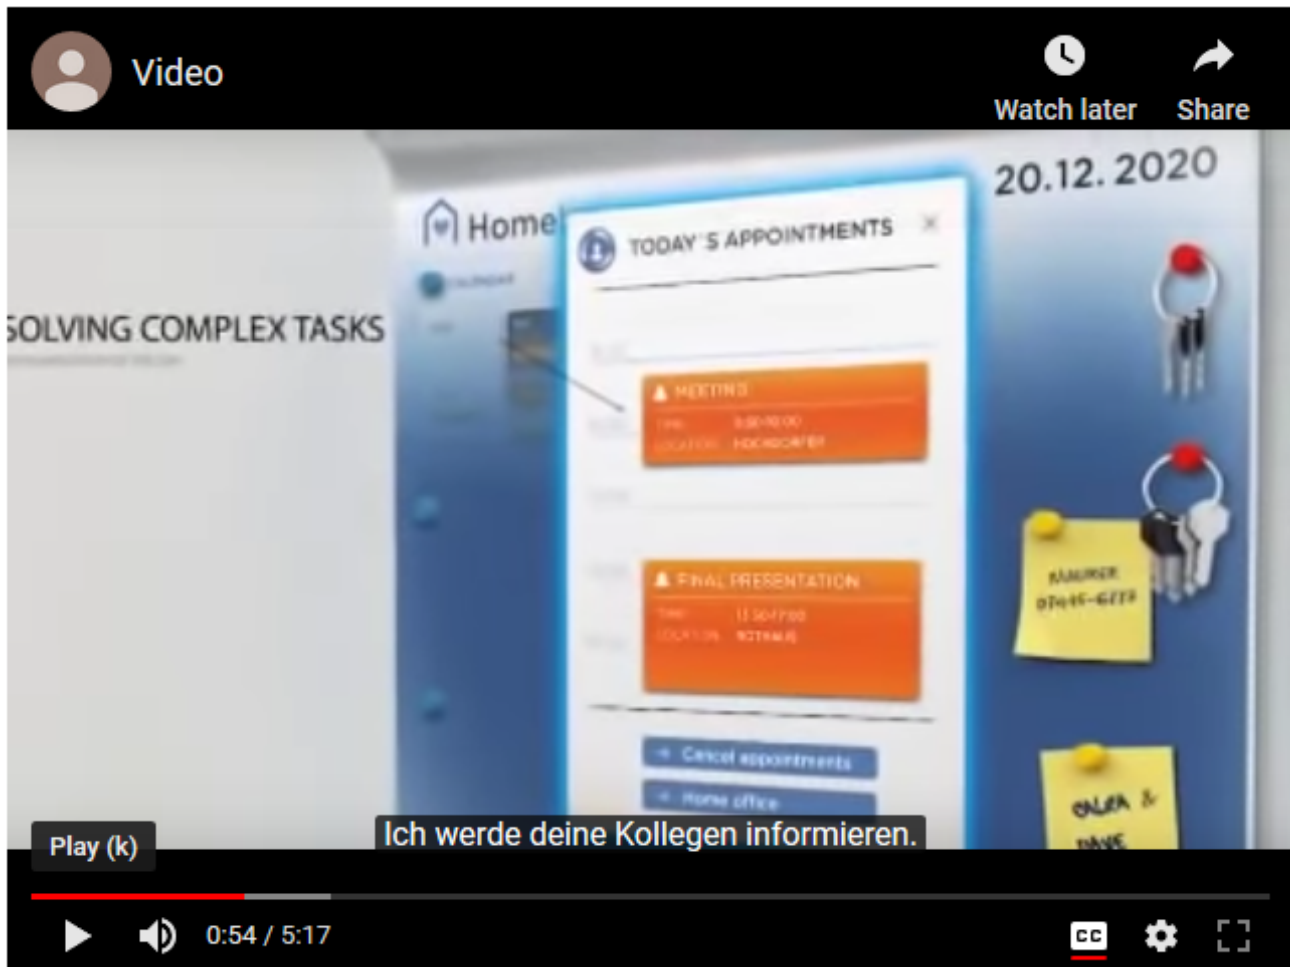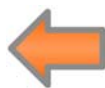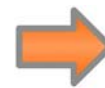

# Survey

Fortschritt 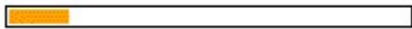 15%

During the use of the assistant your personal data will be processed. The personal assistant can be offered in several alternatives, which differ in terms of the support provided to protect your privacy. We would like to learn about the preferences of potential users. Your privacy support is defined in three areas, which are explained below.

## **Information on the processing of personal data**

The effects of the processing of your personal data may be presented to you in different forms, which differ in scope and comprehensibility.

### 1. Privacy policy:

General conditions regarding data processing can be found in the data protection regulations of the personal assistant. This is a text in legal language. For example, the Personal Assistant may be authorised to access your photo collection using the systems of a third party provider mentioned in the Privacy Policy.

### 2. Visualization

In addition to the data protection regulations, you will also receive a visual explanation that shows you more clearly how and in what form the personal assistant processes your private information.

Example: You will be shown whether and how often your photo collection is actually accessed in the current operation of the personal assistant.

### 3. Prospective analysis

In addition to the data protection regulations and the explanation, you will also receive information about what could possibly happen to your personal data.

Example: You will be informed that the personal assistant could theoretically access the location data in your photo collection to create a motion profile.

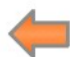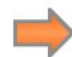

# Survey

Fortschritt 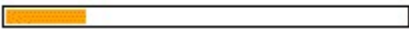 20%

## Explanations of the decisions taken

The decisions made by the personal assistant can be explained to you in varying degrees of detail.

### 1. No explanation

You will receive the decisions of the personal assistant without giving the reasons. Example: While driving, the gasoline runs out. The assistant will inform you in good time if the tank is low, so that you can still reach some petrol stations in your vicinity.

### 2. Processed data

You will receive the decisions of the personal assistant and learn on which data the decisions were made based. Example: While driving, the gasoline runs out. The assistant shows you the way to a nearby petrol station, and a Burger King symbol lights up on the display. You now know that this petrol station is chosen because you like to eat at Burger King. The assistant has learned this preference from your previous behaviour.

### 3. Algorithms

You will receive the decisions of the personal assistant and learn on which data the decisions were made based. In addition, the underlying algorithms are presented and explained. Example: While driving, the fuel is running out and you are shown the way to a petrol station. The Burger King symbol lights up and you are also informed that this is the only petrol station with Burger King within a radius of 200 kilometres. ? You will be shown that the algorithm compares the route that is still drivable with the current fuel level and your current location with the distance to petrol stations in the vicinity.

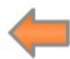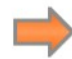

# Survey

Fortschritt  25%

## Interaction with the assistant

You can communicate with the personal assistant regarding your privacy in different ways, which differ in terms of playfulness.

### 1. No playful influences

All interaction with the personal assistant takes place without playful influences, i.e. in pure text form without pictures or symbols.

### 2. Gamified elements

Playful elements are used during the interaction with the personal assistant. Example: You will receive a digital badge for not giving access to your personal contacts to the objects in your networked home for 3 weeks.

### 3. Serious Game

During the interaction with the personal assistant, not only playful elements are used, but you are in a game world with real and serious background. Example: Your apartment is displayed digitally. With a figure you have to try to get to the second floor as quickly as possible to switch off a smart object before it sends your contact details to the manufacturer.

## Monthly price

The price details refer to the monthly costs for the personal assistant. The offer can be cancelled within 4 weeks.

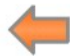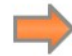

# Survey

Fortschritt  30%

Please indicate in each case which alternative you would choose. If you do not find any of the product variants attractive for the price, you can also choose the non-selection option. **At the bottom of the page you will find a summary of the features as a reminder. Simply scroll to the bottom of the page to look up individual terms.**

Which personal assistant would you buy?

|                                                |                            |                      |                            |                                   |
|------------------------------------------------|----------------------------|----------------------|----------------------------|-----------------------------------|
| Information on the processing of personal data | Data protection provisions | Ad hoc analysis      | Data protection provisions |                                   |
| Explanations of decisions of the assistant     | Algorithms                 | No explanation       | Processed data             | I wouldn't buy one of those three |
| Interaction                                    | No playful influence       | No playful influence | Serious game               |                                   |
| Monthly price                                  | 10 Euro                    | 59 Euro              | 59 Euro                    |                                   |

Which personal assistant would you buy?:

|                                                |                      |                   |                   |                                   |
|------------------------------------------------|----------------------|-------------------|-------------------|-----------------------------------|
| Information on the processing of personal data | Prospective analysis | Visualisation     | Visualisation     | I wouldn't buy one of those three |
| Explanations of decisions of the assistant     | No explanation       | Processed data    | Algorithms        |                                   |
| Interaction                                    | Serious game         | Gamified elements | Gamified elements |                                   |
| Monthly price                                  | 5 Euro               | 30 Euro           | 30 Euro           |                                   |

Which personal assistant would you buy?:

|  |                |               |                |
|--|----------------|---------------|----------------|
|  | Privacy policy | Visualisation | Privacy policy |
|--|----------------|---------------|----------------|

|                                                |                      |                |                      |             |
|------------------------------------------------|----------------------|----------------|----------------------|-------------|
| Information on the processing of personal data |                      |                |                      | I wouldn't  |
| Explanations of decisions of the assistant     | Processed data       | No explanation | Algorithms           | buy one of  |
| Interaction                                    | No playful influence | Serious game   | No playful influence | those three |
| Monthly price                                  | 10 Euro              | 59 Euro        | 5 Euro               |             |

### Information on the processing of personal data

1. Privacy policy: Data processing is governed by the assistant's data protection regulations (Juristen-Deutsch).
2. Visualisation: additional visual explanation that shows you more clearly how and in what form the personal assistant processes your private information.
3. Prospective analysis: Additional information about what might happen to your personal data.

### Explanations for decisions of the assistant

1. No explanations: You receive the decisions of the personal assistant without any explanation of the reasons.
2. Processed data: you receive the decisions of the personal assistant and find out on which data the decisions were made.
3. Algorithms: You receive the decisions of the personal assistant and learn on which data and algorithms the decisions were made based.

### Interaction

1. No playful influences: All interaction with the personal assistant takes place without playful influences, i.e. in pure text form without pictures or symbols.
2. Gamified elements : Playful elements are used during the interaction with the personal assistant.
3. Serious game: Not only playful elements are used, but you are in a game world with a real and serious background.

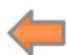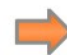



# Survey

Fortschritt  40%

Which personal assistant would you buy?:

|                                                |                   |                      |                      |                                          |
|------------------------------------------------|-------------------|----------------------|----------------------|------------------------------------------|
| Information on the processing of personal data | Visualization     | Prospective analysis | Prospective analysis | <b>I wouldn't buy one of those three</b> |
| Explanations of decisions of the assistant     | No explanation    | Algorithms           | Processed Data       |                                          |
| Interaction                                    | Gamified elements | Gamified elements    | Serious game         |                                          |
| Monthly price                                  | 10 Euro           | 59 Euro              | 10 Euro              |                                          |

Which personal assistant would you buy?:

|                                                |                      |                      |                      |                                          |
|------------------------------------------------|----------------------|----------------------|----------------------|------------------------------------------|
| Information on the processing of personal data | Prospective analysis | Visualization        | Prospective analysis | <b>I wouldn't buy one of those three</b> |
| Explanations of decisions of the assistant     | No explanation       | Algorithms           | No explanation       |                                          |
| Interaction                                    | Gamified elements    | No playful influence | Serious game         |                                          |
| Monthly price                                  | 5 Euro               | 5 Euro               | 30 Euro              |                                          |

Which personal assistant would you buy?:

|                                                |                |                |                |                              |
|------------------------------------------------|----------------|----------------|----------------|------------------------------|
| Information on the processing of personal data | Visualisation  | Privacy policy | Privacy policy | <b>I wouldn't buy one of</b> |
| Explanations of decisions of the assistant     | Processed Data | Processed Data | Algorithms     |                              |

|               |                      |                   |              |                    |
|---------------|----------------------|-------------------|--------------|--------------------|
| Interaction   | No playful influence | Gamified elements | Serious game | <b>those three</b> |
| Monthly Price | 5 Euro               | 10 Euro           | 30 Euro      |                    |

### **Information on the processing of personal data**

1. Privacy policy : Data processing is governed by the data protection regulations of the assistant (Juristen-Deutsch).
2. Visualization: Additional visual explanation that shows you more clearly how and in which form the personal assistant processes your private information.
3. Prospective analysis: additional information about what happens to your personal data could possibly happen.

### **Explanations of decisions made by the assistant**

- 1.No explanations: You receive the decisions of the personal Assistants without any indication of the reasons.
2. Processed data: You receive the decisions of the personal assistants and learn on which data the decisions were made based.
3. Algorithms: You get the decisions of the personal assistants and learn, on the basis of which data and algorithms the decisions was hit.

### **Interaction**

1. No playful influences: All interaction with the personal assistant takes place without playful influences, i.e. in pure text form without pictures or symbols.
2. Gamified elements: During the interaction with the personal assistants use playful elements.
3. Serious game: Not only playful elements are used, but you are in a game world with real and serious background.

# Survey

Fortschritt  50%

Which personal assistant would you buy?:

|                                                |                      |                   |                   |             |
|------------------------------------------------|----------------------|-------------------|-------------------|-------------|
| Information on the processing of personal data | Privacy policy       | Visualization     | Privacy policy    |             |
| Explanations of decisions of the assistant     | No explanation       | No explanation    | Processed Data    | I wouldn't  |
| Interaction                                    | No playful influence | Gamified elements | Gamified elements | buy one of  |
| Monthly price                                  | 30 Euro              | 10 Euro           | 59 Euro           | those three |

Which personal assistant would you buy?:

|                                                |                      |                      |               |             |
|------------------------------------------------|----------------------|----------------------|---------------|-------------|
| Information on the processing of personal data | Prospective analysis | Prospective analysis | Visualization | I wouldn't  |
| Explanations of decisions of the assistant     | Algorithms           | Processed Data       | Algorithms    | buy one of  |
| Interaction                                    | Serious game         |                      | Serious game  | those three |
| Monthly price                                  | 5 Euro               | No playful influence | 30 Euro       |             |
|                                                |                      | 59 Euro              |               |             |

Which personal assistant would you buy?:

|                                                |                      |                      |                |            |
|------------------------------------------------|----------------------|----------------------|----------------|------------|
| Information on the processing of personal data | Prospective analysis | Prospective analysis | Privacy Policy |            |
| Explanations of decisions of the assistant     | Algorithms           | Processed Data       | Algorithms     | I wouldn't |

|               |                      |                   |                   |             |
|---------------|----------------------|-------------------|-------------------|-------------|
| Interaction   | No playful influence | Gamified elements | Gamified elements | buy one of  |
| Monthly Price | 10 Euro              | 30 Euro           | 59 Euro           | those three |

### Information on the processing of personal data

1. Privacy policy : Data processing is governed by the data protection regulations of the assistant (Juristen-Deutsch).
2. Visualization: Additional visual explanation that shows you more clearly how and in which form the personal assistant processes your private information.
3. Prospective analysis: additional information about what happens to your personal data could possibly happen.

### Explanations of decisions made by the assistant

- 1.No explanations: You receive the decisions of the personal Assistants without any indication of the reasons.
2. Processed data: You receive the decisions of the personal assistants and learn on which data the decisions were made based.
3. Algorithms: You get the decisions of the personal assistants and learn, on the basis of which data and algorithms the decisions was hit.

### Interaction

1. No playful influences: All interaction with the personal assistant takes place without playful influences, i.e. in pure text form without pictures or symbols.
2. Gamified elements: During the interaction with the personalassistants use playful elements.
3. Serious game: Not only playful elements are used, but youare in a game world with real and serious background.

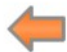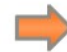

# Survey

Fortschritt  60%

Which personal assistant would you buy?:

|                                                |                                |                |                                        |                                   |
|------------------------------------------------|--------------------------------|----------------|----------------------------------------|-----------------------------------|
| Information on the processing of personal data | Visualization                  | Privacy policy | Visualization                          |                                   |
| Explanations of decisions of the assistant     | No explanation<br>Serious game | Processed Data | No explanation<br>No playful influence | I wouldn't buy one of those three |
| Interaction                                    | 5 Euro                         | Serious game   | 59 Euro                                |                                   |
| Monthly price                                  |                                | 5 Euro         |                                        |                                   |

Which personal assistant would you buy?:

|                                                |                      |                      |                      |                                   |
|------------------------------------------------|----------------------|----------------------|----------------------|-----------------------------------|
| Information on the processing of personal data | Prospective analysis | Prospective analysis | Visualization        |                                   |
| Explanations of decisions of the assistant     | No explanation       | Algorithms           | Processed Data       | I wouldn't buy one of those three |
| Interaction                                    | No playful influence | Serious game         | No playful influence |                                   |
| Monthly price                                  | 30 Euro              | 10 Euro              | 5 Euro               |                                   |

Which personal assistant would you buy?:

|                                                |                |                |                |                                   |
|------------------------------------------------|----------------|----------------|----------------|-----------------------------------|
| Information on the processing of personal data | Privacy policy | Adhoc-Analyse  | Privacy policy | I wouldn't buy one of those three |
|                                                | No explanation | Processed Data | Algorithms     |                                   |

| Explanations of decisions of the assistant | Gamified elements | Gamified elements | Serious game | those three |
|--------------------------------------------|-------------------|-------------------|--------------|-------------|
| Interaction                                | 59 Euro           | 30 Euro           | 59 Euro      |             |
| Monthly price                              |                   |                   |              |             |

### Information on the processing of personal data

1. Privacy policy : Data processing is governed by the data protection regulations of the assistant (Juristen-Deutsch).
2. Visualization: Additional visual explanation that shows you more clearly how and in which form the personal assistant processes your private information.
3. Prospective analysis: additional information about what happens to your personal data could possibly happen.

### Explanations of decisions made by the assistant

- 1.No explanations: You receive the decisions of the personal Assistants without any indication of the reasons.
2. Processed data: You receive the decisions of the personal assistants and learn on which data the decisions were made based.
3. Algorithms: You get the decisions of the personal assistants and learn, on the basis of which data and algorithms the decisions was hit.

### Interaction

1. No playful influences: All interaction with the personal assistant takes place without playful influences, i.e. in pure text form without pictures or symbols.
2. Gamified elements: During the interaction with the personal assistants use playful elements.
3. Serious game: Not only playful elements are used, but you are in a game world with real and serious background.

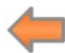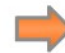

# Survey

Fortschritt  65%

Which personal assistant would you buy?:

|                                                |                      |                |                      |                                   |
|------------------------------------------------|----------------------|----------------|----------------------|-----------------------------------|
| Information on the processing of personal data | Visualization        | Visualization  | Prospective analysis | I wouldn't buy one of those three |
| Explanations of decisions of the assistant     | Processed Data       | Processed Data | Algorithms           |                                   |
| Interaction                                    | No playful influence | Serious game   | Gamified elements    |                                   |
| Monthly price                                  | 30 Euro              | 10 Euro        | 5 Euro               |                                   |

Which personal assistant would you buy?:

|                                                |                         |                                |                         |                                   |
|------------------------------------------------|-------------------------|--------------------------------|-------------------------|-----------------------------------|
| Information on the processing of personal data | Datenschutzbestimmungen | Prospective analysis           | Datenschutzbestimmungen | I wouldn't buy one of those three |
| Explanations of decisions of the assistant     | No explanation          | No explanation<br>Serious game | Algorithms              |                                   |
| Interaction                                    | Gamified elements       | 10 Euro                        | No playful influence    |                                   |
| Monthly price                                  | 5 Euro                  |                                | 5 Euro                  |                                   |

Which personal assistant would you buy?:

|                                                |                |                         |                      |                                   |
|------------------------------------------------|----------------|-------------------------|----------------------|-----------------------------------|
| Information on the processing of personal data | Visualization  | Datenschutzbestimmungen | Prospective analysis | I wouldn't buy one of those three |
| Explanations of decisions of the assistant     | Processed Data | No explanation          | Algorithms           |                                   |

|               |              |                      |                      |             |
|---------------|--------------|----------------------|----------------------|-------------|
| Interaction   | Serious game | No playful influence | No playful influence | those three |
| Monthly Price | 59 Euro      | 30 Euro              | 10 Euro              |             |

### Information on the processing of personal data

1. Privacy policy : Data processing is governed by the data protection regulations of the assistant (Juristen-Deutsch).
2. Visualization: Additional visual explanation that shows you more clearly how and in which form the personal assistant processes your private information.
3. Prospective analysis: additional information about what happens to your personal data could possibly happen.

### Explanations of decisions made by the assistant

- 1.No explanations: You receive the decisions of the personal Assistants without any indication of the reasons.
2. Processed data: You receive the decisions of the personal assistants and learn on which data the decisions were made based.
3. Algorithms: You get the decisions of the personal assistants and learn, on the basis of which data and algorithms the decisions was hit.

### Interaction

1. No playful influences: All interaction with the personal assistant takes place without playful influences, i.e. in pure text form without pictures or symbols.
2. Gamified elements: During the interaction with the personal assistants use playful elements.
3. Serious game: Not only playful elements are used, but you are in a game world with real and serious background.

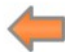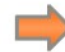



# Survey

Fortschritt  70%

Please indicate to what extent you agree with the following statements

Do not agree at all

Do not agree

Rather not agree

Draw

Agree more to

Agree to

strongly agree

Consumers have completely lost control over how companies collect and treat personal information.

Most companies treat the personal information they collect about consumers in an appropriate and confidential manner.

Existing laws and organizational practices today provide adequate protection for consumer privacy.

Please indicate to what extent you agree with the following statements

Do not agree at all

Do not agree

Rather not agree

Draw

Agree more to

Agree to

strongly agree

I feel anxious when I use technology.

Technical terms sound like confusing jargon to me.

I have avoided technology because I am not familiar with it.

I hesitate to use most forms of technology, for fear of making mistakes I can't correct.

|  |
|--|
|  |
|--|

| Please indicate to what extent you agree with the following statements                         | Do not agree at all | Do not agree | Rather not agree | Draw | Agree more to | Agree to | strongly agree |
|------------------------------------------------------------------------------------------------|---------------------|--------------|------------------|------|---------------|----------|----------------|
| I prefer to do the same old things instead of trying new and different things.                 |                     |              |                  |      |               |          |                |
| I like to experience novelty and change in my everyday life.                                   |                     |              |                  |      |               |          |                |
| I like a workplace that offers change, diversity and travel, even if it involves some dangers. |                     |              |                  |      |               |          |                |
| I am always looking for new ideas and experiences.                                             |                     |              |                  |      |               |          |                |
| I like to constantly change activities.                                                        |                     |              |                  |      |               |          |                |
| When things get boring, I like to find new and unknown experiences.                            |                     |              |                  |      |               |          |                |
| I prefer a regulated way of life instead of an unpredictable one full of change.               |                     |              |                  |      |               |          |                |

# Survey

Fortschritt  75%

Please indicate to what extent you agree with the following statements

Do not agree at all

Do not agree

Rather not agree

Draw

Agree more to

Agree to

strongly agree

When I see a new product on the shelf, I am reluctant to try it out.

In general, I am among the first to buy new products when they come on the market.

If I like one brand, I rarely switch to another just to try something new.

I am very careful when it comes to trying out new and different products.

I am usually among the first to try new brands.

I rarely buy brands where I am unsure what they will perform.

I like to seize opportunities by buying new products

I do not like to buy a new product before others do.

Please indicate to what extent you agree with the following statements

Do not agree at all

Do not agree

Rather not agree

Draw

Agree more to

Agree to

strongly agree

I have the feeling that I can fully trust the personal assistant.

The personal assistant is really sincere about his promises.

The Personal Assistant is honest and truthful with me.

The Personal Assistant treats me fairly and justly.

I feel that I can rely on the Personal Assistant when I need him.

I have the feeling that the personal assistant does not give me enough consideration.

Please indicate to what extent you agree with the following statements

Do not agree at all

Do not agree

Rather not agree

Draw

Agree more to

Agree to

strongly agree

I would not use the default settings supplied by the manufacturer regarding data protection, but would adapt them according to my ideas.

In the presence of friends or acquaintances, I would give the assistant orders to communicate with me more carefully in order to protect my privacy.

I would always switch off the personal assistant in the presence of strangers.

It is important for me to be able to regulate exactly which people in my environment receive which information during communication with the personal assistant.

I would take steps to ensure that the personal assistants of friends and acquaintances respect my privacy.

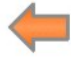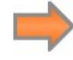

# Survey

Fortschritt  80%

Please indicate to what extent you agree with the following statements  
I trust others.

Do not agree at all

Do not agree

Rather not agree

Draw

Agree more to

Agree to

strongly agree

I believe that others have good intentions.

I trust what people say.

I believe that people basically have morals.

I believe in human goodness.

I believe that everything will be all right.

Please indicate to what extent you agree with the following statements

Do not agree at all

Do not agree

Rather not agree

Draw

Agree more to

Agree to

strongly agree

I enjoy being reckless..

I take risks.

I look for danger.

I know how to bend the rules.

I'm willing to try anything once.

I'm looking for adventure.

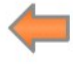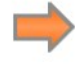

# Survey

Fortschritt  85%

With the following questions we ask you to characterize yourself when you use a smartphone. For each adjective, please indicate to what extent it applies to you with regard to the use of smartphones.

Does not apply at all    Does not apply    Not likely to apply    Draw    More likely to apply    Applies    Totally correct

Spontaneous

Unimaginative

Flexible

Creative

Playful

Not very original

Non-inventive

Please indicate how secure you feel in each case

Extremely unsecure    Unsecure    Rather unsecure    Draw    Rather safe    Safe    Extremely safe

How safe do you feel to apply for a loan or credit online?

How safe do you feel to make investments online?

How safe do you feel when banking online (e.g. viewing your account balance, making transfers)?

Very negative    Negative    Rather negative    Draw    Rather positiv    Positiv    Very positiv



Please enter your setting for the personal assistant.

What is your general opinion of the personal assistant??

Please enter your setting for the personal assistant.

Not useful at all      Not useful      Rather not useful      Draw      Rather useful      Useful      Very useful

How useful is the personal assistant?

Please enter your setting for the personal assistant..

Minor modification of an existing product      Uninnovativ      Rather little innovativ      Draw      Rather innovativ      Innovativ      Complete new Product

How innovative is the personal assistant?

Please enter your setting for the personal assistant.

Very unlikely      Unlikely      Rather unlikely      Draw      Rather likely      Likely      Very likely

With what probability would you buy the personal assistant?

# Survey

Fortschritt  90%

## Gender

Male

Female

## How old are you?

years

## What is your marital status?

Single

In a relationship

Married

Other

## How many children do you have?

No children

1 child

2 children

3 children

4 children

More than 4 children

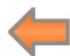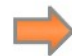

# Survey

Fortschritt  95%

## What kind of work do you do?

- Full-time employed
- Working part-time
- Marginal employment
- Unemployed
- Retirement / pension / retirement
- Not employed (e.g. housewife householder)
- In vocational training / apprenticeship

## Your net income, i.e. the money you have available each month:

- No own income
- 0 – 500 Euro
- 501 – 1000 Euro
- 1001 – 1500 Euro
- 1501 – 2000 Euro
- 2001 – 2500 Euro
- 2501 – 3000 Euro
- 3001 – 3500 Euro
- 3501 – 4000 Euro
- More than 4000 Euro
- Not specified

## In which state do you live?

--- Bitte wählen Sie --- 

## What is your highest general educational level?

--- Bitte wählen Sie --- 

**How often do you spend your free time with game consoles or computer games (e.g. PlayStation)?**

Never

Approx. 1 time per year

Approx. 1 time per month

Approx. 1 time per week

Daily

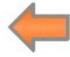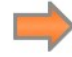

Supplement: 12525_2020_447_MOESM8_ESM.pdf [file 12525_2020_447_MOESM8_ESM.pdf]
