# Supplementary material for: User preferences for privacy features in digital assistants
Source: Springer Nature journal article supplement (doi:10.1007/s12525-020-00447-y), 2020-11-30
Supplement: 12525_2020_447_MOESM1_ESM.pdf [file 12525_2020_447_MOESM1_ESM.pdf]

# Appendix 1

| Attribute                                                                                                                                                                                                                                                                    | Attribute levels                                                            |
|------------------------------------------------------------------------------------------------------------------------------------------------------------------------------------------------------------------------------------------------------------------------------|-----------------------------------------------------------------------------|
| <b>Deployment site</b><br>(Cohen et al. 2015)                                                                                                                                                                                                                                | Ubiquitous                                                                  |
|                                                                                                                                                                                                                                                                              | Physical sphere (smart home, smart car)                                     |
|                                                                                                                                                                                                                                                                              | Digital sphere (app permissions on smartphones)                             |
| <b>Degree of automation</b><br>(Reuter-Oppermann et al. 2017)                                                                                                                                                                                                                | Fully automated                                                             |
|                                                                                                                                                                                                                                                                              | Semi-automated                                                              |
|                                                                                                                                                                                                                                                                              | Manual                                                                      |
| <b>Playful design</b><br>(Blohm and Leimeister 2013; Deterding et al. 2011; Huotari and Hamari 2017; Luger and Sellen 2016; Zynga Inc. 2017)                                                                                                                                 | No gamified elements                                                        |
|                                                                                                                                                                                                                                                                              | Gamification                                                                |
|                                                                                                                                                                                                                                                                              | Serious Game                                                                |
| <b>Way of communication</b><br>(Knote et al. 2019)                                                                                                                                                                                                                           | Text-based                                                                  |
|                                                                                                                                                                                                                                                                              | Image-based                                                                 |
|                                                                                                                                                                                                                                                                              | Voice-based                                                                 |
| <b>Explainability of the assistant's decisions</b><br>(Adadi and Berrada; Doshi-Velez and Kim 2017; Förster et al. 2020, 2020; Gunaratne et al. 2018; Hoffman et al. 2018; Lim et al. 2009; Luger and Sellen 2016; Miller et al. 2019; Pasquale 2015; Samek and Müller 2019) | No explanation: Decision of the UPA is presented without explanation.       |
|                                                                                                                                                                                                                                                                              | Processed data: Users learn about the information the decision is based on. |
|                                                                                                                                                                                                                                                                              | Algorithms: Users learn about the algorithms behind the decision.           |
| <b>Manufacturer's reputation</b><br>(Harborth and Pape 2019; Purohit and Srivastava 2001)                                                                                                                                                                                    | Well-known international manufacturer                                       |
|                                                                                                                                                                                                                                                                              | Well-known international manufacturer within the software industry          |
|                                                                                                                                                                                                                                                                              | Unknown manufacturer                                                        |
| <b>Level of abstraction</b><br>(Guan et al. 2020; Jeong et al. 2015; Wagner and Schramm-Klein 2019)                                                                                                                                                                          | Device represented as real device with an image                             |
|                                                                                                                                                                                                                                                                              | Device represented with an icon                                             |
|                                                                                                                                                                                                                                                                              | Device represented as text with corresponding MAC address                   |
| <b>Privacy profiles of users</b><br>(Liu et al. 2016)                                                                                                                                                                                                                        | Direct questioning (e.g. using a wizard)                                    |
|                                                                                                                                                                                                                                                                              | Intelligent (profile is generated while using the assistant)                |
|                                                                                                                                                                                                                                                                              | No profile                                                                  |
| <b>Assistant's interactivity</b><br>(Knote et al. 2019)                                                                                                                                                                                                                      | Active (direct interaction with user)                                       |
|                                                                                                                                                                                                                                                                              | Passive (no direct interaction with user, observational)                    |
|                                                                                                                                                                                                                                                                              | Both                                                                        |
| <b>Notification method</b><br>(Biehl et al. 2013; Pötzsch 2009)                                                                                                                                                                                                              | In app/assistant                                                            |
|                                                                                                                                                                                                                                                                              | Via pop-up message                                                          |
|                                                                                                                                                                                                                                                                              | Via e-mail                                                                  |

| <b>Attribute</b>                                                                                                                      | <b>Attribute levels</b>                                                                                |
|---------------------------------------------------------------------------------------------------------------------------------------|--------------------------------------------------------------------------------------------------------|
| <b>Presentation of information</b><br>(Galitz 2007; Hansen et al. 2014; Hedbom 2009)                                                  | No information, only a warning if privacy problems arise                                               |
|                                                                                                                                       | Information about direct impacts of a decision                                                         |
|                                                                                                                                       | Information about direct impacts of a decision. Additional information about the data holder is given. |
| <b>Acceptance of feature limitations while enhancing privacy</b><br>(Reinheimer et al. 2016)                                          | No acceptance                                                                                          |
|                                                                                                                                       | Accepting limitation, while not limiting the main functions of the assistant                           |
|                                                                                                                                       | Accepting full feature limitations                                                                     |
| <b>Usage context</b><br>(Blohm and Leimeister 2013; Knotte et al. 2019; London Economics 2010; Menard et al. 2017; Vance et al. 2012) | General usage                                                                                          |
|                                                                                                                                       | Usage when user is concerned (e.g. data breaches are in the news)                                      |
|                                                                                                                                       | With regard to Protection Motivation Theory                                                            |
| <b>Usage frequency</b><br>(London Economics 2010)                                                                                     | Continuous                                                                                             |
|                                                                                                                                       | Once a day                                                                                             |
|                                                                                                                                       | Infrequent                                                                                             |
| <b>Reason for usage</b><br>(Dinev et al. 2015; GlobalWebIndex 2019; McLean and Osei-Frimpong 2019)                                    | Interest in privacy settings, using it as a central management system                                  |
|                                                                                                                                       | Fear of data disclosure of data holder                                                                 |
|                                                                                                                                       | Help with privacy decisions                                                                            |
| <b>Social component with privacy community</b><br>(Knotte et al. 2019; Liu et al. 2016; Pappachan et al. 2017; Sonehara et al. 2011)  | No interaction with others                                                                             |
|                                                                                                                                       | Exchange of privacy settings with friends                                                              |
|                                                                                                                                       | Implementation of privacy settings of other institutions (best practices)                              |

Table 1: Possible key attributes and attribute levels for privacy features of assistants

## References

- Adadi A, Berrada M Peeking Inside the Black-Box: A Survey on Explainable Artificial Intelligence (XAI), vol 6, pp 52138–52160
- Biehl JT, Rieffel EG, Lee AJ (2013) When privacy and utility are in harmony: Towards better design of presence technologies. *Personal and Ubiquitous Computing* 17:503–518.  
<https://doi.org/10.1007/s00779-012-0504-7>
- Blohm I, Leimeister JM (2013) Gamification - Design of IT-Based Enhancing Services for Motivational Support and Behavioral Change. *Business & Information Systems Engineering* 5:275–278.  
<https://doi.org/10.1007/s12599-013-0273-5>
- Cohen P, Cheyer A, Horvitz E, El Kaliouby R, Whittaker S (2015) On the Future of Personal Assistants. In: Kaye J, Druin A, Lampe C, Morris D, Hourcade JP (eds) CHI 2016: #chi4good ; proceedings ; The 34rd Annual CHI Conference on Human Factors in Computing Systems, San Jose, CA, USA, May 07 - 12, 2016. ACM, New York, NY, pp 1032–1037
- Deterding S, Dixon D, Khaled R, Nacke L (2011) From game design elements to gamefulness. In: Lugmayr A, Franssila H, Safran C, Hammouda I (eds) Proceedings of the 15th International

- Academic MindTrek Conference Envisioning Future Media Environments. ACM, New York, NY, pp 9–15
- Dinev T, McConnell AR, Smith HJ (2015) Research Commentary—Informing Privacy Research Through Information Systems, Psychology, and Behavioral Economics: Thinking Outside the “APCO” Box. *Information Systems Research* 26:639–655. <https://doi.org/10.1287/isre.2015.0600>
- Doshi-Velez F, Kim B (2017) Towards A Rigorous Science of Interpretable Machine Learning. <https://arxiv.org/pdf/1702.08608>
- Förster M, Klier M, Kluge K, Sigler I (2020) Evaluating Explainable Artificial Intelligence – What Users Really Appreciate. *ECIS 2020 Research Papers*
- Galitz WO (2007) *The Essential Guide to User Interface Design: An Introduction to GUI Design Principles and Techniques*. Wiley
- Guan J, Lessio N, Shao Y, Morris DA (2020) Exploring a Mixed Reality Framework for the Internet-of-Things: Toward Visualization and Interaction with Hybrid Objects and Avatars. In: Johnsen K, MacIntyre B, Swan E, II, Kiyokawa K (eds) *IEEE Conference on Virtual Reality and 3D User Interfaces Abstracts and Workshops (VRW)*. IEEE, p 858
- Gunaratne J, Zalmanson L, Nov O (2018) The Persuasive Power of Algorithmic and Crowdsourced Advice. *Journal of Management Information Systems* 35:1092–1120. <https://doi.org/10.1080/07421222.2018.1523534>
- Hansen M, Hoepman J-H, Leenes R, Whitehouse D, Fischer-Hübner S, Angulo J, Pulls T (eds) (2014) *How can Cloud Users be Supported in Deciding on, Tracking and Controlling How their Data are Used?: Privacy and Identity Management for Emerging Services and Technologies*. Springer Berlin Heidelberg
- Harborth D, Pape S (2019) How Privacy Concerns and Trust and Risk Beliefs Influence Users’ Intentions to Use Privacy-Enhancing Technologies - The Case of Tor. In: Bui T (ed) *Proceedings of the 52nd Hawaii International Conference on System Sciences*. Hawaii International Conference on System Sciences
- Hedbom H (2009) A Survey on Transparency Tools for Enhancing Privacy: The Future of Identity in the Information Society. In: Matyáš V, Cvrček D, Fischer-Hübner S, Švenda P (eds) *The Future of Identity in the Information Society: 4th IFIP WG 9.2, 9.6/11.6, 11.7/FIDIS International Summer School, Brno, Czech Republic, September 1-7, 2008, Revised Selected Papers*. Springer Berlin Heidelberg, Berlin, Heidelberg, pp 67–82
- Hoffman R, Miller T, Mueller ST, Klein G, Clancey WJ (2018) Explaining Explanation, Part 4: A Deep Dive on Deep Nets. *IEEE Intell. Syst.* 33:87–95. <https://doi.org/10.1109/MIS.2018.033001421>
- Huotari K, Hamari J (2017) A definition for gamification: anchoring gamification in the service marketing literature. *Electron Markets* 27:21–31. <https://doi.org/10.1007/s12525-015-0212-z>
- Jeong Y, Joo H, Hong G, Shin D, Lee S (2015) AVIoT: Web-based interactive authoring and visualization of indoor internet of things. *IEEE Trans. Consumer Electron.* 61:295–301. <https://doi.org/10.1109/TCE.2015.7298088>
- Knote R, Janson A, Söllner M, Leimeister JM (2019) Classifying Smart Personal Assistants: An Empirical Cluster Analysis. In: *Hawaii International Conference on System Sciences (HICSS)*, Maui, Hawaii, USA
- Lim BY, Dey AK, Avraami D (2009) Why and why not explanations improve the intelligibility of context-aware intelligent systems. In: Olsen DR, Arthur RB, Hinckley K, Morris MR, Hudson S, Greenberg S (eds) *CHI 2009 - digital life, new world: Conference proceedings and extended abstracts ; the 27th Annual CHI Conference on Human Factors in Computing Systems, April 4 - 9, 2009 in Boston, USA*. ACM, New York, NY, p 2119
- Liu B, Andersen MS, Schaub F, Almuhammedi H, Zhang S, Sadeh N, Acquisti A, Agarwal Y (2016) Follow My Recommendations: A Personalized Privacy Assistant for Mobile App Permissions. In: *Proceedings of SOUPS 2016: Twelfth Symposium on Usable Privacy and Security: June 22-24, 2016, Denver, CO, USA*. USENIX Association, Berkeley, CA, pp 27–41
- London Economics (2010) *Study on the economic benefits of privacy-enhancing technologies (PETs)*. <https://londoneconomics.co.uk/blog/publication/study-on-the-economic-benefits-of-privacy-enhancing-technologies-pets/>. Accessed 6 March 2019

- Luger E, Sellen A (2016) "Like Having a Really Bad PA": The Gulf between User Expectation and Experience of Conversational Agents. In: Kaye J, Druin A, Lampe C, Morris D, Hourcade JP (eds) CHI 2016: Proceedings, the 34th Annual CHI Conference on Human Factors in Computing Systems, San Jose Convention Center : San Jose, CA, USA, May 7-12. The Association for Computing Machinery, New York, New York, pp 5286–5297
- McLean G, Osei-Frimpong K (2019) Hey Alexa ... examine the variables influencing the use of artificial intelligent in-home voice assistants. *Computers in Human Behavior* 99:28–37. <https://doi.org/10.1016/j.chb.2019.05.009>
- Menard P, Bott GJ, Crossler RE (2017) User Motivations in Protecting Information Security: Protection Motivation Theory Versus Self-Determination Theory. *Journal of Management Information Systems* 34:1203–1230. <https://doi.org/10.1080/07421222.2017.1394083>
- Miller T, Mittelstadt B, Russell C, Wachter S (2019) Explanation in Artificial Intelligence: Insights from the Social Sciences. In: Proceedings of the Conference on Fairness, Accountability, and Transparency. ACM, New York NY, pp 1–66
- Pappachan P, Degeling M, Yus R, Das A, Bhagavatula S, Melicher W, Naeini PE, Zhang S, Bauer L, Kobsa A, Mehrotra S, Sadeh N, Venkatasubramanian N (2017) Towards Privacy-Aware Smart Buildings: Capturing, Communicating, and Enforcing Privacy Policies and Preferences. In: Musaev A (ed) IEEE 37th International Conference on Distributed Computing Systems workshops: Proceedings. ICDCSW 2017. IEEE, Piscataway, NJ, pp 193–198
- Pasquale F (2015) *The Black Box Society: The Secret Algorithms That Control Money and Information*. Harvard University Press
- Pöttsch S (2009) Privacy Awareness: A Means to Solve the Privacy Paradox? In: Matyáš V, Cvrček D, Fischer-Hübner S, Švenda P (eds) *The Future of Identity in the Information Society: 4th IFIP WG 9.2, 9.6/11.6, 11.7/FIDIS International Summer School, Brno, Czech Republic, September 1-7, 2008, Revised Selected Papers*. Springer Berlin Heidelberg, Berlin, Heidelberg
- Purohit D, Srivastava J (2001) Effect of Manufacturer Reputation, Retailer Reputation, and Product Warranty on Consumer Judgments of Product Quality: A Cue Diagnosticity Framework. *Journal of Consumer Psychology* 10:123–134. [https://doi.org/10.1207/s15327663jcp1003\\_1](https://doi.org/10.1207/s15327663jcp1003_1)
- Reuter-Oppermann M, Morana S, Hottum P (2017) Towards Designing an Assistant for Semi-Automatic EMS Dispatching. In: Bui T (ed) Proceedings of the Annual Hawaii International Conference on System Sciences. Hawaii International Conference on System Sciences
- Samek W, Müller K-R (2019) Towards Explainable Artificial Intelligence. In: Samek W, Montavon G, Vedaldi A (eds) *Explainable AI: Interpreting, explaining and visualizing deep learning*. Springer International Publishing, Cham, pp 5–22
- Sonehara N, Echizen I, Wohlgemuth S (2011) Isolation in Cloud Computing and Privacy-Enhancing Technologies. *Business & Information Systems Engineering* 3:155. <https://doi.org/10.1007/s12599-011-0160-x>
- Vance A, Siponen M, Pahlila S (2012) Motivating IS security compliance: Insights from Habit and Protection Motivation Theory. *Information & Management* 49:190–198. <https://doi.org/10.1016/j.im.2012.04.002>
- Wagner K, Schramm-Klein H (2019) Alexa, Are You Human? Investigating Anthropomorphism of Digital Voice Assistants – A Qualitative Approach. *ICIS 2019 Proceedings*
- Zynga Inc. (2017) *PrivacyVille*. <https://www.zynga.com/privacy/privacyville>. Accessed 1 December 2017
