# Supplementary material for: User preferences for privacy features in digital assistants
Source: Springer Nature journal article supplement (doi:10.1007/s12525-020-00447-y), 2020-11-30
Supplement: 12525_2020_447_MOESM2_ESM.pdf [file 12525_2020_447_MOESM2_ESM.pdf]

# Appendix 2: Literature Review Process

## Searched journals and conference proceedings:

Using the Scopus search engine

|                                                                             |
|-----------------------------------------------------------------------------|
| AIS Basket of Eight                                                         |
| SIG HCI                                                                     |
| Proceedings of the CHI Conference on Human Factors in Computing Systems     |
| Proceedings of the USENIX Conference on Usable Privacy and Security (SOUPS) |

## Search keywords:

### General (information) privacy:

- Privacy OR (information privacy) OR digital privacy
- Privatsphäre OR Datenschutz AND (Internet OR digital OR computer)

### Digital assistants:

- (Smart OR intelligent OR digital OR personal OR IoT OR home) AND assistants OR assistance
- Assistants AND (definition OR functions OR capabilities OR usage)
- (smart OR intelligent OR personal) assistant

### Privacy usability:

- Privacy AND (usability OR game OR gamification OR nudging OR serious game)

### Privacy-related capabilities and functions of digital assistants (not labelled with the term “assistant”):

- Privacy AND reactive OR proactive OR social interaction OR personalized tool OR interaction OR humanization

### Usage domains of DAs:

- Derived from surveys about the usage of IoT devices (Statista 2015a, 2015b). The top two most used domains were adopted.

### Privacy in usage domains of DA:

- Privacy OR Datenschutz OR Privatsphäre Connected OR smart car OR (Home AND (smart OR intelligent))

We also searched these words in a Google web search to involve state-of-the-art insights from websites and news portals.

**Privacy assistance:**

Work in the concrete field of privacy assistance was searched by keywords derived from a synonym search.<sup>1</sup> Table 1 shows these keywords and their results in a Google Scholar search. To include a great number of possible results, we used the term “privacy” instead of “information privacy” for this search.

| <b>(Privacy OR private data) AND ...</b> | <b>Search results or mentions</b>                                                                                                                                                                                                                                                                                                                                               |
|------------------------------------------|---------------------------------------------------------------------------------------------------------------------------------------------------------------------------------------------------------------------------------------------------------------------------------------------------------------------------------------------------------------------------------|
| assistant                                | A great number of papers concerning e-commerce or privacy concerns of users when interacting with (digital) assistants.<br>Some promising examples: <ul style="list-style-type: none"> <li>• Lin et al. 2014</li> <li>• Sadeh et al. 2017</li> <li>• Das et al. 2018</li> <li>• Campagna et al. 2017</li> <li>• Liu et al. 2016</li> <li>• Muthukrishnan et al. 2005</li> </ul> |
| assistance                               | Most results about medical or emergency issues                                                                                                                                                                                                                                                                                                                                  |
| assist                                   | No sufficient matches                                                                                                                                                                                                                                                                                                                                                           |
| companion                                | No sufficient matches                                                                                                                                                                                                                                                                                                                                                           |
| aid                                      | No sufficient matches                                                                                                                                                                                                                                                                                                                                                           |
| colleague                                | No sufficient matches                                                                                                                                                                                                                                                                                                                                                           |
| friend                                   | Mostly Facebook-related or location-based (LBS) papers                                                                                                                                                                                                                                                                                                                          |
| buddy                                    | No sufficient matches                                                                                                                                                                                                                                                                                                                                                           |
| secretary                                | No sufficient matches                                                                                                                                                                                                                                                                                                                                                           |
| robot                                    | Mostly about real robotic devices and an ethical or legal perspective                                                                                                                                                                                                                                                                                                           |

Table 1 – Privacy assistance search queries

**Forward- and backward searched papers:**

Bélangier and Crossler 2011, Smith et al. 2011, Acquisti et al. 2015, Maedche et al. 2019, Biehl et al. 2013, Acquisti et al. 2017, Mihale-Wilson et al. 2017, Zibuschka et al. 2016, Fruchter and Liccardi 2018  
Schaub et al. 2015, Liu et al. 2016, Almuhimedi et al. 2015, Gluck et al. 2016, Pappachan et al. 2017, Das et al. 2018

**Exclusion:**

Papers focusing on privacy protection, social media or privacy paradox were excluded from further consideration. Further, we excluded papers published earlier than 2000.

**Searches outside the above mentioned journals:**

For very precise keywords that produced 0 results in the above-mentioned journals and proceedings, we conducted a search in Google scholar.

---

<sup>1</sup> Conducted via <http://www.thesaurus.com>.

# Search process:

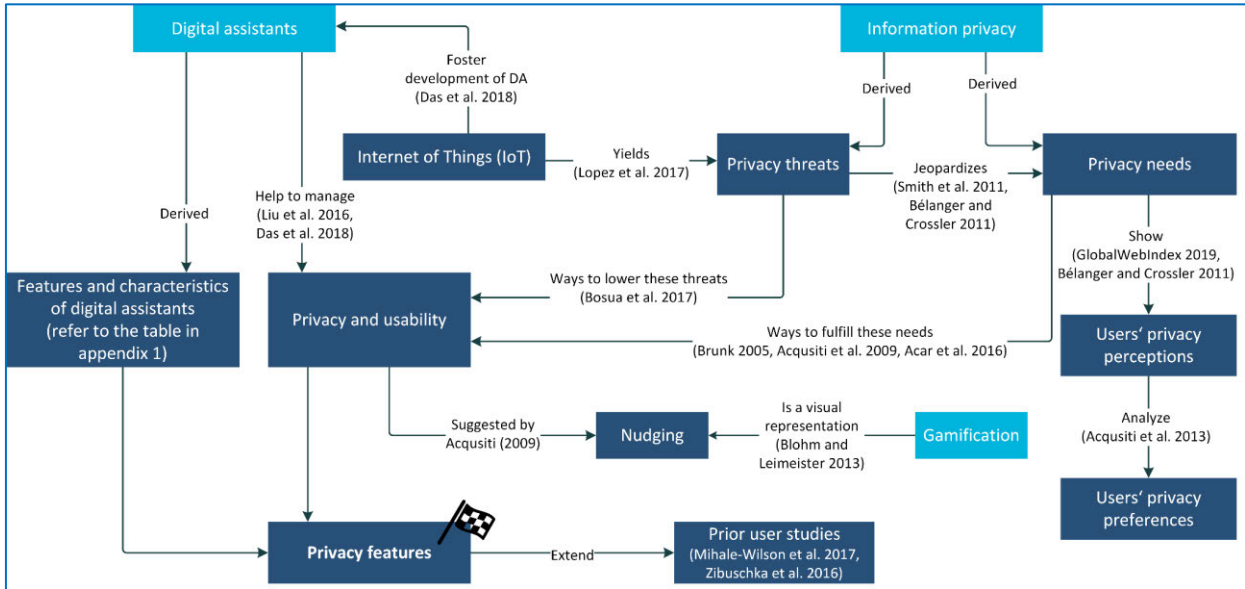

Figure 1 - Literature Search Process

Figure 1 shows the literature search process. The light blue boxes symbolize initial start search topics/ideas, whereas the dark blue boxes show topics derived from the search. The relationship between the concepts is shown and explained by the arrows.

## References

- Acquisti A, Brandimarte L, Loewenstein G (2015) Privacy and human behavior in the age of information. *Science* 347:509–514
- Acquisti A, Sleeper M, Wang Y, Wilson S, Adjerid I, Balebako R, Brandimarte L, Cranor LF, Komanduri S, Leon PG, Sadeh N, Schaub F (2017) Nudges for Privacy and Security: Understanding and Assisting Users' Choices Online. *ACM Comput. Surv.* 50:1–41. <https://doi.org/10.1145/3054926>
- Almuhimedi H, Schaub F, Sadeh N, Adjerid I, Acquisti A, Gluck J, Cranor LF, Agarwal Y (2015) Your Location has been Shared 5,398 Times!: A Field Study on Mobile App Privacy Nudging. In: Kim J (ed) CHI 2015 crossings: Proceedings of the 33rd Annual CHI Conference on Human Factors in Computing Systems. ACM, New York, NY, pp 787–796
- Bélanger F, Crossler RE (2011) Privacy in the digital age: A review of information privacy research in information systems. *MIS Quarterly* 35:1017–1042. <https://doi.org/10.2307/41409971>
- Biehl JT, Rieffel EG, Lee AJ (2013) When privacy and utility are in harmony: Towards better design of presence technologies. *Personal and Ubiquitous Computing* 17:503–518. <https://doi.org/10.1007/s00779-012-0504-7>
- Campagna G, Ramesh R, Xu S, Fischer M, Lam MS (2017) Almond: The Architecture of an Open, Crowdsourced, Privacy-Preserving, Programmable Virtual Assistant. In: Barrett R, Cummings R, Agichtein E, Gabrilovich E (eds) Proceedings of the 26th International Conference on World Wide Web - WWW '17. ACM Press, New York, New York, USA, pp 341–350
- Das A, Degeling M, Smullen D, Sadeh N (2018) Personalized Privacy Assistants for the Internet of Things: Providing Users with Notice and Choice. *IEEE Pervasive Comput.* 17:35–46. <https://doi.org/10.1109/MPRV.2018.03367733>
- Fruchter N, Liccardi I (2018) Consumer Attitudes Towards Privacy and Security in Home Assistants. In: Mandryk R, Hancock M (eds) Extended abstracts of the 2018 CHI Conference on Human Factors in Computing Systems (CHI EA '18). ACM, New York, NY, pp 1–6
- Gluck J, Schaub F, Friedman A, Habib H, Sadeh N, Cranor LF, Agarwal Y (2016) How Short Is Too Short? Implications of Length and Framing on the Effectiveness of Privacy Notices. In: Proceedings of the Twelfth USENIX Conference on Usable Privacy and Security (SOUPS '16). USENIX Association, Berkeley, CA, pp 321–340
- Lin J, Liu B, Sadeh N, Hong JI (2014) Modeling Users' Mobile App Privacy Preferences: Restoring Usability in a Sea of Permission Settings. In: Proceedings of the Tenth Symposium On Usable Privacy and Security. USENIX Association, Berkeley, Calif., pp 199–212
- Liu B, Andersen MS, Schaub F, Almuhimedi H, Zhang S, Sadeh N, Acquisti A, Agarwal Y (2016) Follow My Recommendations: A Personalized Privacy Assistant for Mobile App Permissions. In: Proceedings of the Twelfth USENIX Conference on Usable Privacy and Security (SOUPS '16). USENIX Association, Berkeley, CA, pp 27–41

- Maedche A, Legner C, Benlian A, Berger B, Gimpel H, Hess T, Hinz O, Morana S, Söllner M (2019) AI-Based Digital Assistants. *Business & Information Systems Engineering* 61:535–544. <https://doi.org/10.1007/s12599-019-00600-8>
- Mihale-Wilson C, Zibuschka J, Hinz O (2017) About User Preferences and Willingness to Pay for a Secure and Privacy Protective Ubiquitous Personal Assistant. In: *Proceedings of the 25th European Conference on Information Systems (ECIS)*, pp 32–47
- Muthukrishnan K, Meratnia N, Lijding MEM (2005) FLAVOUR: Friendly Location-aware conference Assistant with priVacy Observant architectURe
- Pappachan P, Degeling M, Yus R, Das A, Bhagavatula S, Melicher W, Naeini PE, Zhang S, Bauer L, Kobsa A, Mehrotra S, Sadeh N, Venkatasubramanian N (2017) Towards Privacy-Aware Smart Buildings: Capturing, Communicating, and Enforcing Privacy Policies and Preferences. In: Musaev A (ed) *IEEE 37th International Conference on Distributed Computing Systems Workshops (ICDCSW)*. IEEE, Atlanta, GA, USA, pp 193–198
- Sadeh N, Degeling M, Das A, Zhang AS, Acquisti A, Bauer L, Cranor L, Datta A, Smullen D (2017) A Privacy Assistant for the Internet of Things. In: *Proceedings of SOUPS 2017*. USENIX Association, Berkeley, CA, pp 1–5
- Schaub F, Balebako R, Durity AL, Cranor LF (2015) A Design Space for Effective Privacy Notices. In: Cranor LF (ed) *Proceedings of the Eleventh Symposium On Usable Privacy and Security*. USENIX Association, pp 1–17
- Smith HJ, Dinev T, Xu H (2011) Information privacy research: An interdisciplinary review. *MIS Quarterly* 35:989–1016
- Statista (2015a) Connected things/devices worldwide by vertical 2015-2021. <https://www.statista.com/statistics/626256/connected-things-devices-worldwide-by-vertical/>. Accessed 13 February 2018
- Statista (2015b) Prognose zum Bestand an Consumer-IoT-Geräten in Deutschland von 2015 bis 2020 nach Produktgruppe (in Millionen Einheiten). <https://de.statista.com/statistik/daten/studie/537105/umfrage/bestand-an-consumer-iot-geraeten-in-deutschland/>. Accessed 24 January 2018
- Zibuschka J, Nofer M, Hinz O (2016) Zahlungsbereitschaft für Datenschutzfunktionen intelligenter Assistenten. In: Nissen V, Stelzer D, Straßburger S, Fischer D (eds) *Multikonferenz Wirtschaftsinformatik (MKWI) 2016: Technische Universität Ilmenau, 09. - 11. März 2016*. Universitätsverlag Ilmenau, Ilmenau, pp 1391–1402
