# Supplementary material for: User preferences for privacy features in digital assistants
Source: Springer Nature journal article supplement (doi:10.1007/s12525-020-00447-y), 2020-11-30
Supplement: 12525_2020_447_MOESM3_ESM.pdf [file 12525_2020_447_MOESM3_ESM.pdf]

# Appendix 3: Sample Information

## Table of Contents

|                                                                     |    |
|---------------------------------------------------------------------|----|
| Descriptive statistics of the full participants' sample.....        | 2  |
| Descriptive statistics of always, sometimes and non-purchasers..... | 3  |
| Always purchasers .....                                             | 3  |
| Sometimes purchasers.....                                           | 4  |
| Non- purchasers .....                                               | 5  |
| Best ager cluster of sometimes purchasers .....                     | 6  |
| DA advocates cluster of sometimes purchasers .....                  | 7  |
| Cross tabulations .....                                             | 8  |
| Gender * segment name .....                                         | 8  |
| Marital status * segment name.....                                  | 8  |
| Age group * segment name.....                                       | 9  |
| Number of children * segment name.....                              | 9  |
| Occupation * segment name .....                                     | 10 |
| Education level * segment name.....                                 | 10 |
| Income * segment name .....                                         | 11 |
| Confirmatory factor analysis .....                                  | 12 |
| Model.....                                                          | 12 |
| Estimations .....                                                   | 12 |

## Descriptive statistics of the full participants' sample

n=303

| Gender | N   |        |
|--------|-----|--------|
| female | 151 | 49.83% |
| male   | 152 | 50.17% |

| Age                 | N      |        |
|---------------------|--------|--------|
| 18-23               | 26     | 8.58%  |
| 24-34               | 61     | 20.13% |
| 35-44               | 68     | 22.44% |
| 45-54               | 66     | 21.78% |
| 55-64               | 53     | 17.49% |
| 65-69               | 29     | 9.57%  |
| Mean                | 44.14  |        |
| Variance $\delta^2$ | 203.48 |        |

| Marital status | N   |        |
|----------------|-----|--------|
| Single         | 107 | 35.31% |
| In partnership | 53  | 17.49% |
| Married        | 129 | 42.57% |
| other          | 14  | 4.62%  |

| Number of children | N   |        |
|--------------------|-----|--------|
| none               | 150 | 49.50% |
| 1                  | 69  | 22.77% |
| 2                  | 60  | 19.80% |
| 3                  | 13  | 4.29%  |
| 4                  | 6   | 1.98%  |
| more than 4        | 5   | 1.65%  |

| Education         | N   |        |
|-------------------|-----|--------|
| No education      | 0   | 0.00%  |
| Secondary school  | 79  | 26.07% |
| Higher education  | 116 | 38.28% |
| University degree | 107 | 35.31% |
| Doctoral degree   | 1   | 0.33%  |

| Income (p.m.) | N  |        |
|---------------|----|--------|
| €0            | 9  | 2.97%  |
| <€500         | 14 | 4.62%  |
| €501-€1000    | 33 | 10.89% |
| €1001-€1500   | 49 | 16.17% |
| €1501-€2000   | 36 | 11.88% |
| €2001-€2500   | 46 | 15.18% |
| €2501-€3000   | 38 | 12.54% |
| €3001-€3500   | 11 | 3.63%  |
| €3501-€4000   | 14 | 4.62%  |
| >4000€        | 22 | 7.26%  |
| Not specified | 31 | 10.23% |

| Occupation                            | N   |        |
|---------------------------------------|-----|--------|
| Fulltime employed                     | 139 | 45.87% |
| Part-time employed                    | 45  | 14.85% |
| Minor employment                      | 6   | 1.98%  |
| Unemployed                            | 18  | 5.94%  |
| Retired                               | 48  | 15.84% |
| Non-working (housewife/house husband) | 25  | 8.25%  |
| In training                           | 22  | 7.26%  |

## Descriptive statistics of always, sometimes and non-purchasers

### Always purchasers

| Gender | N  |        |
|--------|----|--------|
| female | 32 | 56.14% |
| male   | 25 | 43.86% |

| Age                     | N      |        |
|-------------------------|--------|--------|
| 18-23                   | 13     | 22.81% |
| 24-34                   | 18     | 31.58% |
| 35-44                   | 13     | 22.81% |
| 45-54                   | 7      | 12.28% |
| 55-64                   | 4      | 7.02%  |
| 65-69                   | 2      | 3.51%  |
| Mean                    | 35.35  |        |
| Variance s <sup>2</sup> | 160.66 |        |

| Marital status | N  |        |
|----------------|----|--------|
| Single         | 22 | 38.60% |
| In partnership | 11 | 19.30% |
| Married        | 22 | 38.60% |
| other          | 2  | 3.51%  |

| Education         | N  |        |
|-------------------|----|--------|
| No education      | 0  | 0.00%  |
| Secondary school  | 8  | 14.04% |
| Higher education  | 24 | 42.11% |
| University degree | 25 | 43.86% |
| Doctoral degree   | 0  | 0.00%  |

| Income (p.m.) | N  |        |
|---------------|----|--------|
| € 0           | 3  | 5.26%  |
| <€500         | 3  | 5.26%  |
| €501-€1000    | 5  | 8.77%  |
| €1001-€1500   | 12 | 21.05% |
| €1501-€2000   | 5  | 8.77%  |
| €2001-€2500   | 6  | 10.53% |
| €2501-€3000   | 12 | 21.05% |
| €3001-€3500   | 3  | 5.26%  |
| €3501-€4000   | 3  | 5.26%  |
| >4000€        | 3  | 5.26%  |
| Not specified | 2  | 3.51%  |

| Occupation                            | N  |        |
|---------------------------------------|----|--------|
| Fulltime employed                     | 29 | 50.88% |
| Part-time employed                    | 8  | 14.04% |
| Minor employment                      | 1  | 1.75%  |
| Unemployed                            | 5  | 8.77%  |
| Retired                               | 2  | 3.51%  |
| Non-working (housewife/house husband) | 3  | 5.26%  |
| In training                           | 9  | 15.79% |

| Number of children | N  |        |
|--------------------|----|--------|
| none               | 32 | 56.14% |
| 1                  | 13 | 22.81% |
| 2                  | 8  | 14.04% |
| 3                  | 3  | 5.26%  |
| 4                  | 1  | 1.75%  |
| more than 4        | 0  | 0.00%  |

## Sometimes purchasers

| <b>Gender</b> | N   |        |
|---------------|-----|--------|
| female        | 60  | 52.63% |
| male          | 54  | 47.37% |
| Total         | 114 |        |

| <b>Age</b>              | N      |        |
|-------------------------|--------|--------|
| 18-23                   | 14     | 12.28% |
| 24-34                   | 25     | 21.93% |
| 35-44                   | 25     | 21.93% |
| 45-54                   | 30     | 26.32% |
| 55-64                   | 13     | 11.40% |
| 65-69                   | 7      | 6.14%  |
| mean                    | 42.09  |        |
| Variance s <sup>2</sup> | 181.94 |        |

| <b>Marital status</b> | N  |        |
|-----------------------|----|--------|
| Single                | 42 | 36.84% |
| In partnership        | 24 | 21.05% |
| Married               | 45 | 39.47% |
| other                 | 3  | 2.63%  |

| <b>Education</b>  | N  |        |
|-------------------|----|--------|
| No education      | 0  | 0.00%  |
| Secondary school  | 25 | 21.93% |
| Higher education  | 41 | 35.96% |
| University degree | 48 | 42.11% |
| Doctoral degree   | 0  | 0.00%  |

| <b>Income (p.m.)</b> | N  |        |
|----------------------|----|--------|
| € 0                  | 2  | 1.75%  |
| <€500                | 3  | 2.63%  |
| €501-€1000           | 12 | 10.53% |
| €1001-€1500          | 16 | 14.04% |
| €1501-€2000          | 17 | 14.91% |
| €2001-€2500          | 20 | 17.54% |
| €2501-€3000          | 15 | 13.16% |
| €3001-€3500          | 3  | 2.63%  |
| €3501-€4000          | 5  | 4.39%  |
| >4000€               | 9  | 7.89%  |
| Not specified        | 12 | 10.53% |

| <b>Occupation</b>                     | N  |        |
|---------------------------------------|----|--------|
| Fulltime employed                     | 60 | 52.63% |
| Part-time employed                    | 19 | 16.67% |
| Minor employment                      | 3  | 2.63%  |
| Unemployed                            | 3  | 2.63%  |
| Retired                               | 11 | 9.65%  |
| Non-working (housewife/house husband) | 10 | 8.77%  |
| In training                           | 8  | 7.02%  |

| <b>Number of children</b> | N  |        |
|---------------------------|----|--------|
| none                      | 63 | 55.26% |
| 1                         | 23 | 20.18% |
| 2                         | 18 | 15.79% |
| 3                         | 6  | 5.26%  |
| 4                         | 2  | 1.75%  |
| more than 4               | 2  | 1.75%  |

## Non- purchasers

| <b>Gender</b> | N   |        |
|---------------|-----|--------|
| female        | 59  | 44.70% |
| male          | 73  | 55.30% |
| Total         | 132 |        |

| <b>Age</b>              | N    |        |
|-------------------------|------|--------|
| 18-23                   | 8    | 6.06%  |
| 24-34                   | 9    | 6.82%  |
| 35-44                   | 30   | 22.73% |
| 45-54                   | 29   | 21.97% |
| 55-64                   | 36   | 27.27% |
| 65-69                   | 20   | 15.15% |
| mean                    | 49.7 |        |
| Variance s <sup>2</sup> | 175  |        |

| <b>Marital status</b> | N  |        |
|-----------------------|----|--------|
| Single                | 43 | 32.58% |
| In partnership        | 18 | 13.64% |
| Married               | 62 | 46.97% |
| other                 | 9  | 6.82%  |

| <b>Education</b>  | N  |        |
|-------------------|----|--------|
| No education      | 0  | 0.00%  |
| Secondary school  | 46 | 34.85% |
| Higher education  | 51 | 38.64% |
| University degree | 34 | 25.76% |
| Doctoral degree   | 1  | 0.76%  |

| <b>Income (p.m.)</b> | N  |        |
|----------------------|----|--------|
| € 0                  | 4  | 3.03%  |
| <€500                | 8  | 6.06%  |
| €501-€1000           | 16 | 12.12% |
| €1001-€1500          | 21 | 15.91% |
| €1501-€2000          | 14 | 10.61% |
| €2001-€2500          | 20 | 15.15% |
| €2501-€3000          | 11 | 8.33%  |
| €3001-€3500          | 5  | 3.79%  |
| €3501-€4000          | 6  | 4.55%  |
| >4000€               | 10 | 7.58%  |
| Not specified        | 17 | 12.88% |

| <b>Occupation</b>                     | N  |        |
|---------------------------------------|----|--------|
| Fulltime employed                     | 50 | 37.88% |
| Part-time employed                    | 18 | 13.64% |
| Minor employment                      | 2  | 1.52%  |
| Unemployed                            | 10 | 7.58%  |
| Retired                               | 35 | 26.52% |
| Non-working (housewife/house husband) | 12 | 9.09%  |
| In training                           | 5  | 3.79%  |

| <b>Number of children</b> | N  |        |
|---------------------------|----|--------|
| none                      | 55 | 41.67% |
| 1                         | 33 | 25.00% |
| 2                         | 34 | 25.76% |
| 3                         | 4  | 3.03%  |
| 4                         | 3  | 2.27%  |
| more than 4               | 3  | 2.27%  |

## Best ager cluster of sometimes purchasers

| Gender | N  |        |
|--------|----|--------|
| female | 28 | 54.90% |
| male   | 23 | 45.10% |
| Total  | 51 |        |

| Age                     | N     |        |
|-------------------------|-------|--------|
| 18-23                   | 0     | 0.00%  |
| 24-34                   | 0     | 0.00%  |
| 35-44                   | 1     | 1.96%  |
| 45-54                   | 30    | 58.82% |
| 55-64                   | 13    | 25.49% |
| 65-69                   | 7     | 13.73% |
| mean                    | 54.82 |        |
| Variance s <sup>2</sup> | 47.23 |        |

| Marital status | N  |        |
|----------------|----|--------|
| Single         | 17 | 33.33% |
| In partnership | 4  | 7.84%  |
| Married        | 28 | 54.90% |
| other          | 2  | 3.92%  |

| Education         | N  |        |
|-------------------|----|--------|
| No education      | 0  | 0.00%  |
| Secondary school  | 17 | 33.33% |
| Higher education  | 15 | 29.41% |
| University degree | 19 | 37.25% |
| Doctoral degree   | 0  | 0.00%  |

| Income (p.m.) | N  |        |
|---------------|----|--------|
| € 0           | 1  | 1.96%  |
| <€500         | 1  | 1.96%  |
| €501-€1000    | 2  | 3.92%  |
| €1001-€1500   | 10 | 19.61% |
| €1501-€2000   | 11 | 21.57% |
| €2001-€2500   | 9  | 17.65% |
| €2501-€3000   | 6  | 11.76% |
| €3001-€3500   | 2  | 3.92%  |
| €3501-€4000   | 1  | 1.96%  |
| >4000€        | 3  | 5.88%  |
| Not specified | 5  | 9.80%  |

| Occupation                            | N  |        |
|---------------------------------------|----|--------|
| Fulltime employed                     | 25 | 49.02% |
| Part-time employed                    | 9  | 17.65% |
| Minor employment                      | 1  | 1.96%  |
| Unemployed                            | 1  | 1.96%  |
| Retired                               | 10 | 19.61% |
| Non-working (housewife/house husband) | 5  | 9.80%  |
| In training                           | 0  | 0.00%  |

| Number of children | N  |        |
|--------------------|----|--------|
| none               | 21 | 41.18% |
| 1                  | 11 | 21.57% |
| 2                  | 12 | 23.53% |
| 3                  | 4  | 7.84%  |
| 4                  | 1  | 1.96%  |
| more than 4        | 2  | 3.92%  |

## DA advocates cluster of sometimes purchasers

| <b>Gender</b> | N  |        |
|---------------|----|--------|
| female        | 32 | 50.79% |
| male          | 31 | 49.21% |
| Total         | 63 |        |

| <b>Age</b>              | N     |        |
|-------------------------|-------|--------|
| 18-23                   | 14    | 22.22% |
| 24-34                   | 25    | 39.68% |
| 35-44                   | 24    | 38.10% |
| 45-54                   | 0     | 0.00%  |
| 55-64                   | 0     | 0.00%  |
| 65-69                   | 0     | 0.00%  |
| mean                    | 37.78 |        |
| Variance s <sup>2</sup> | 52.08 |        |

| <b>Marital status</b> | N  |        |
|-----------------------|----|--------|
| Single                | 25 | 39.68% |
| In partnership        | 20 | 31.75% |
| Married               | 17 | 26.98% |
| other                 | 1  | 1.59%  |

| <b>Education</b>  | N  |        |
|-------------------|----|--------|
| No education      | 0  | 0.00%  |
| Secondary school  | 8  | 12.70% |
| Higher education  | 26 | 41.27% |
| University degree | 29 | 46.03% |
| Doctoral degree   | 0  | 0.00%  |

| <b>Income (p.m.)</b> | N  |        |
|----------------------|----|--------|
| € 0                  | 1  | 1.59%  |
| <€500                | 2  | 3.17%  |
| €501-€1000           | 10 | 15.87% |
| €1001-€1500          | 6  | 9.52%  |
| €1501-€2000          | 6  | 9.52%  |
| €2001-€2500          | 11 | 17.46% |
| €2501-€3000          | 9  | 14.29% |
| €3001-€3500          | 1  | 1.59%  |
| €3501-€4000          | 4  | 6.35%  |
| >4000€               | 6  | 9.52%  |
| Not specified        | 7  | 11.11% |

| <b>Occupation</b>                     | N  |        |
|---------------------------------------|----|--------|
| Fulltime employed                     | 35 | 55.56% |
| Part-time employed                    | 10 | 15.87% |
| Minor employment                      | 2  | 3.17%  |
| Unemployed                            | 2  | 3.17%  |
| Retired                               | 1  | 1.59%  |
| Non-working (housewife/house husband) | 5  | 7.94%  |
| In training                           | 8  | 12.70% |

| <b>Number of children</b> | N  |        |
|---------------------------|----|--------|
| none                      | 42 | 66.67% |
| 1                         | 12 | 19.05% |
| 2                         | 6  | 9.52%  |
| 3                         | 2  | 3.17%  |
| 4                         | 1  | 1.59%  |
| more than 4               | 0  | 0.00%  |

## Cross tabulations

### Gender \* segment name

|        |                       | Segment name     |               |                     | total  |
|--------|-----------------------|------------------|---------------|---------------------|--------|
|        |                       | Always purchaser | Non purchaser | Sometimes purchaser |        |
| female | count                 | 32               | 59            | 60                  | 151    |
|        | % within gender       | 21.2%            | 39.1%         | 39.7%               | 100.0% |
|        | % within segment name | 56.1%            | 44.7%         | 52.6%               | 49.8%  |
| male   | count                 | 25               | 73            | 54                  | 152    |
|        | % within gender       | 16.4%            | 48.0%         | 35.5%               | 100.0% |
|        | % within segment name | 43.9%            | 55.3%         | 47.4%               | 50.2%  |
| total  | count                 | 57               | 132           | 114                 | 303    |
|        | % within gender       | 18.8%            | 43.6%         | 37.6%               | 100.0% |
|        | % within segment name | 100.0%           | 100.0%        | 100.0%              | 100.0% |

### Marital status \* segment name

|                |                         | Segment Name     |               |                     | Total  |
|----------------|-------------------------|------------------|---------------|---------------------|--------|
|                |                         | Always purchaser | Non purchaser | Sometimes purchaser |        |
| Single         | count                   | 22               | 43            | 42                  | 107    |
|                | % within marital status | 20.6%            | 40.2%         | 39.3%               | 100.0% |
|                | % within segment name   | 38.6%            | 32.6%         | 36.8%               | 35.3%  |
| In partnership | count                   | 11               | 18            | 24                  | 53     |
|                | % within marital status | 20.8%            | 34.0%         | 45.3%               | 100.0% |
|                | % within segment name   | 19.3%            | 13.6%         | 21.1%               | 17.5%  |
| Married        | count                   | 22               | 62            | 45                  | 129    |
|                | % within marital status | 17.1%            | 48.1%         | 34.9%               | 100.0% |
|                | % within segment name   | 38.6%            | 47.0%         | 39.5%               | 42.6%  |
| Other          | count                   | 2                | 9             | 3                   | 14     |
|                | % within marital status | 14.3%            | 64.3%         | 21.4%               | 100.0% |
|                | % within segment name   | 3.5%             | 6.8%          | 2.6%                | 4.6%   |
| Total          | count                   | 57               | 132           | 114                 | 303    |
|                | % within marital status | 18.8%            | 43.6%         | 37.6%               | 100.0% |
|                | % within segment name   | 100.0%           | 100.0%        | 100.0%              | 100.0% |



### Age group \* segment name

|       |                       | Segment name     |               |                     | Total  |
|-------|-----------------------|------------------|---------------|---------------------|--------|
|       |                       | Always purchaser | Non purchaser | Sometimes purchaser |        |
| 18-23 | count                 | 13               | 8             | 14                  | 35     |
|       | % within age group    | 37.1%            | 22.9%         | 40.0%               | 100.0% |
|       | % within segment name | 22.8%            | 6.1%          | 12.3%               | 11.6%  |
| 24-34 | count                 | 18               | 9             | 25                  | 52     |
|       | % within age group    | 34.6%            | 17.3%         | 48.1%               | 100.0% |
|       | % within segment name | 31.6%            | 6.8%          | 21.9%               | 17.2%  |
| 35-44 | count                 | 13               | 30            | 25                  | 68     |
|       | % within age group    | 19.1%            | 44.1%         | 36.8%               | 100.0% |
|       | % within segment name | 22.8%            | 22.7%         | 21.9%               | 22.4%  |
| 45-54 | count                 | 7                | 29            | 30                  | 66     |
|       | % within age group    | 10.6%            | 43.9%         | 45.5%               | 100.0% |
|       | % within segment name | 12.3%            | 22.0%         | 26.3%               | 21.8%  |
| 55-64 | count                 | 4                | 36            | 13                  | 53     |
|       | % within age group    | 7.5%             | 67.9%         | 24.5%               | 100.0% |
|       | % within segment name | 7.0%             | 27.3%         | 11.4%               | 17.5%  |
| 65-69 | count                 | 2                | 20            | 7                   | 29     |
|       | % within age group    | 6.9%             | 69.0%         | 24.1%               | 100.0% |
|       | % within segment name | 3.5%             | 15.2%         | 6.1%                | 9.6%   |
| Total | count                 | 57               | 132           | 114                 | 303    |
|       | % within age group    | 18.8%            | 43.6%         | 37.6%               | 100.0% |
|       | % within segment name | 100.0%           | 100.0%        | 100.0%              | 100.0% |

### Number of children \* segment name

|             |                             | Segment name     |               |                     | Total  |
|-------------|-----------------------------|------------------|---------------|---------------------|--------|
|             |                             | Always purchaser | Non purchaser | Sometimes purchaser |        |
| none        | count                       | 32               | 55            | 63                  | 150    |
|             | % within number of children | 21.3%            | 36.7%         | 42.0%               | 100.0% |
|             | % within segment name       | 56.1%            | 41.7%         | 55.3%               | 49.5%  |
| 1           | count                       | 13               | 33            | 23                  | 69     |
|             | % within number of children | 18.8%            | 47.8%         | 33.3%               | 100.0% |
|             | % within segment name       | 22.8%            | 25.0%         | 20.2%               | 22.8%  |
| 2           | count                       | 8                | 34            | 18                  | 60     |
|             | % within number of children | 13.3%            | 56.7%         | 30.0%               | 100.0% |
|             | % within segment name       | 14.0%            | 25.8%         | 15.8%               | 19.8%  |
| 3           | count                       | 3                | 4             | 6                   | 13     |
|             | % within number of children | 23.1%            | 30.8%         | 46.2%               | 100.0% |
|             | % within segment name       | 5.3%             | 3.0%          | 5.3%                | 4.3%   |
| 4           | count                       | 1                | 3             | 2                   | 6      |
|             | % within number of children | 16.7%            | 50.0%         | 33.3%               | 100.0% |
|             | % within segment name       | 1.8%             | 2.3%          | 1.8%                | 2.0%   |
| more than 4 | count                       | 0                | 3             | 2                   | 5      |
|             | % within number of children | 0.0%             | 60.0%         | 40.0%               | 100.0% |
|             | % within segment name       | 0.0%             | 2.3%          | 1.8%                | 1.7%   |
| Total       | count                       | 57               | 132           | 114                 | 303    |
|             | % within number of children | 18.8%            | 43.6%         | 37.6%               | 100.0% |
|             | % within segment name       | 100.0%           | 100.0%        | 100.0%              | 100.0% |

**Occupation \* segment name**

|                                       |                       | Segment Name     |               |                     | Total  |
|---------------------------------------|-----------------------|------------------|---------------|---------------------|--------|
|                                       |                       | Always purchaser | Non purchaser | Sometimes purchaser |        |
| Fulltime employed                     | count                 | 29               | 50            | 60                  | 139    |
|                                       | % within occupation   | 20.9%            | 36.0%         | 43.2%               | 100.0% |
|                                       | % within segment name | 50.9%            | 37.9%         | 52.6%               | 45.9%  |
| Part-time employed                    | count                 | 8                | 18            | 19                  | 45     |
|                                       | % within occupation   | 17.8%            | 40.0%         | 42.2%               | 100.0% |
|                                       | % within segment name | 14.0%            | 13.6%         | 16.7%               | 14.9%  |
| Minor employment                      | count                 | 1                | 2             | 3                   | 6      |
|                                       | % within occupation   | 16.7%            | 33.3%         | 50.0%               | 100.0% |
|                                       | % within segment name | 1.8%             | 1.5%          | 2.6%                | 2.0%   |
| Unemployed                            | count                 | 5                | 10            | 3                   | 18     |
|                                       | % within occupation   | 27.8%            | 55.6%         | 16.7%               | 100.0% |
|                                       | % within segment name | 8.8%             | 7.6%          | 2.6%                | 5.9%   |
| Retired                               | count                 | 2                | 35            | 11                  | 48     |
|                                       | % within occupation   | 4.2%             | 72.9%         | 22.9%               | 100.0% |
|                                       | % within segment name | 3.5%             | 26.5%         | 9.6%                | 15.8%  |
| Non-working (housewife/house husband) | count                 | 3                | 12            | 10                  | 25     |
|                                       | % within occupation   | 12.0%            | 48.0%         | 40.0%               | 100.0% |
|                                       | % within segment name | 5.3%             | 9.1%          | 8.8%                | 8.3%   |
| In training                           | count                 | 9                | 5             | 8                   | 22     |
|                                       | % within occupation   | 40.9%            | 22.7%         | 36.4%               | 100.0% |
|                                       | % within segment name | 15.8%            | 3.8%          | 7.0%                | 7.3%   |
| Total                                 | count                 | 57               | 132           | 114                 | 303    |
|                                       | % within occupation   | 18.8%            | 43.6%         | 37.6%               | 100.0% |
|                                       | % within segment name | 100.0%           | 100.0%        | 100.0%              | 100.0% |

**Education level \* segment name**

|                   |                          | Segment Name     |               |                     | Total  |
|-------------------|--------------------------|------------------|---------------|---------------------|--------|
|                   |                          | Always purchaser | Non purchaser | Sometimes purchaser |        |
| Secondary School  | count                    | 8                | 46            | 25                  | 79     |
|                   | % within education level | 10.1%            | 58.2%         | 31.6%               | 100.0% |
|                   | % within segment name    | 14.0%            | 34.8%         | 21.9%               | 26.1%  |
| Higher Education  | count                    | 24               | 51            | 41                  | 116    |
|                   | % within education level | 20.7%            | 44.0%         | 35.3%               | 100.0% |
|                   | % within segment name    | 42.1%            | 38.6%         | 36.0%               | 38.3%  |
| University Degree | count                    | 25               | 34            | 48                  | 107    |
|                   | % within education level | 23.4%            | 31.8%         | 44.9%               | 100.0% |
|                   | % within segment name    | 43.9%            | 25.8%         | 42.1%               | 35.3%  |
| Doctoral Degree   | count                    | 0                | 1             | 0                   | 1      |
|                   | % within education level | 0.0%             | 100.0%        | 0.0%                | 100.0% |
|                   | % within segment name    | 0.0%             | 0.8%          | 0.0%                | 0.3%   |
| Total             | count                    | 57               | 132           | 114                 | 303    |
|                   | % within education level | 18.8%            | 43.6%         | 37.6%               | 100.0% |
|                   | % within segment name    | 100.0%           | 100.0%        | 100.0%              | 100.0% |

**Income \* segment name**

|               |                       | Segment Name     |               |                     | Total  |
|---------------|-----------------------|------------------|---------------|---------------------|--------|
|               |                       | Always purchaser | Non purchaser | Sometimes purchaser |        |
| €0            | count                 | 3                | 4             | 2                   | 9      |
|               | % within income       | 33.3%            | 44.4%         | 22.2%               | 100.0% |
|               | % within segment name | 5.3%             | 3.0%          | 1.8%                | 3.0%   |
| <€500         | count                 | 3                | 8             | 3                   | 14     |
|               | % within income       | 21.4%            | 57.1%         | 21.4%               | 100.0% |
|               | % within segment name | 5.3%             | 6.1%          | 2.6%                | 4.6%   |
| €501-€1000    | count                 | 5                | 16            | 12                  | 33     |
|               | % within income       | 15.2%            | 48.5%         | 36.4%               | 100.0% |
|               | % within segment name | 8.8%             | 12.1%         | 10.5%               | 10.9%  |
| €1001-€1500   | count                 | 12               | 21            | 16                  | 49     |
|               | % within income       | 24.5%            | 42.9%         | 32.7%               | 100.0% |
|               | % within segment name | 21.1%            | 15.9%         | 14.0%               | 16.2%  |
| €1501-€2000   | count                 | 5                | 14            | 17                  | 36     |
|               | % within income       | 13.9%            | 38.9%         | 47.2%               | 100.0% |
|               | % within segment name | 8.8%             | 10.6%         | 14.9%               | 11.9%  |
| €2001-€2500   | count                 | 6                | 20            | 20                  | 46     |
|               | % within income       | 13.0%            | 43.5%         | 43.5%               | 100.0% |
|               | % within segment name | 10.5%            | 15.2%         | 17.5%               | 15.2%  |
| €2501-€3000   | count                 | 12               | 11            | 15                  | 38     |
|               | % within income       | 31.6%            | 28.9%         | 39.5%               | 100.0% |
|               | % within segment name | 21.1%            | 8.3%          | 13.2%               | 12.5%  |
| €3001-€3500   | count                 | 3                | 5             | 3                   | 11     |
|               | % within income       | 27.3%            | 45.5%         | 27.3%               | 100.0% |
|               | % within segment name | 5.3%             | 3.8%          | 2.6%                | 3.6%   |
| €3501-€4000   | count                 | 3                | 6             | 5                   | 14     |
|               | % within income       | 21.4%            | 42.9%         | 35.7%               | 100.0% |
|               | % within segment name | 5.3%             | 4.5%          | 4.4%                | 4.6%   |
| >4000€        | count                 | 3                | 10            | 9                   | 22     |
|               | % within income       | 13.6%            | 45.5%         | 40.9%               | 100.0% |
|               | % within segment name | 5.3%             | 7.6%          | 7.9%                | 7.3%   |
| Not specified | count                 | 2                | 17            | 12                  | 31     |
|               | % within income       | 6.5%             | 54.8%         | 38.7%               | 100.0% |
|               | % within segment name | 3.5%             | 12.9%         | 10.5%               | 10.2%  |
| Total         | count                 | 57               | 132           | 114                 | 303    |
|               | % within income       | 18.8%            | 43.6%         | 37.6%               | 100.0% |
|               | % within segment name | 100.0%           | 100.0%        | 100.0%              | 100.0% |

## Confirmatory factor analysis

We used STATA/SE 14.0 for our analysis

### Model

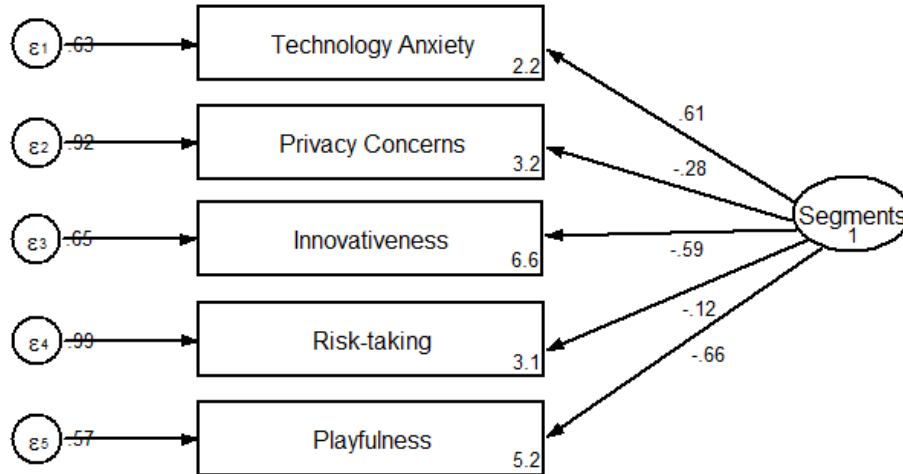

### Estimations

Number of obs. = 114

Estimation method = ml

Log likelihood = 779.05253

| Standardized                      | Coeff.    | OIM<br>Std. Err. | z     | P> z  | [95% Conf. Interval] |           |
|-----------------------------------|-----------|------------------|-------|-------|----------------------|-----------|
| Technology Anxiety <-<br>Segments | .6061882  | .0950091         | 6.38  | 0.000 | .4199738             | .7924026  |
| _cons                             | 2.205928  | .1735349         | 12.71 | 0.000 | 1.865806             | 2.54605   |
| Privacy Concerns <-<br>Segments   | -.2842017 | .110614          | -2.57 | 0.010 | -.5010012            | -.0674023 |
| _cons                             | 3.202322  | .2318391         | 13.81 | 0.000 | 2.747926             | 3.656719  |
| Innovativeness <-<br>Segments     | -.5949773 | .1020251         | -5.83 | 0.000 | -.7949428            | -.3950118 |
| _cons                             | 6.638017  | .449479          | 14.77 | 0.000 | 5.757055             | 7.51898   |
| Risk-taking <-<br>Segments        | -.1193734 | .1169061         | -1.02 | 0.307 | -.3485051            | .1097583  |
| _cons                             | 3.052519  | .2227999         | 13.70 | 0.000 | 2.615839             | 3.489199  |
| Playfulness <-<br>Segments        | -.6554415 | .0975671         | -6.72 | 0.000 | -.8466695            | -.4642135 |
| _cons                             | 5.168293  | .3548608         | 14.56 | 0.000 | 4.472779             | 5.863808  |
| var(e.Technology Anxiety)         | .6325359  | .1151868         |       |       | .4426686             | .9038402  |
| var(e.Privacy Concerns)           | .9192294  | .0628734         |       |       | .8039027             | 1.051101  |
| var(e.innovativeness)             | .646002   | .1214052         |       |       | .446956              | .9336904  |
| var(e.Risk-taking)                | .98575    | .0279109         |       |       | .9325358             | 1.042001  |
| var(e.Playfulness)                | .5703965  | .127899          |       |       | .3675474             | .8851978  |
| var(Segments)                     | 1         | .                |       |       | .                    | .         |

LR test of model vs. saturated:  $\chi^2(5) = 7.60$ . Prob.  $> \chi^2 = 0.1796$

**estat gof. stats(all)**

| <b>Fit statistic</b>        | <b>Value</b> | <b>Description</b>                       |
|-----------------------------|--------------|------------------------------------------|
| <b>Likelihood ratio</b>     |              |                                          |
| chi2 ms(5)                  | 7.602        | model vs. saturated                      |
| p > chi2                    | 0.180        |                                          |
| chi2 bs(10)                 | 60.221       | baseline vs. saturated                   |
| p > chi2                    | 0.000        |                                          |
| <b>Population error</b>     |              |                                          |
| RMSEA                       | 0.068        | Root mean squared error of approximation |
| 90% CI. lower bound         | 0.000        |                                          |
| upper bound                 | 0.158        |                                          |
| pclose                      | 0.316        | Probability RMSEA $\leq 0.05$            |
| <b>Information criteria</b> |              |                                          |
| AIC                         | 1.588.105    | Akaike's information criterion           |
| BIC                         | 1.629.148    | Bayesian information criterion           |
| <b>Baseline comparison</b>  |              |                                          |
| CFI                         | 0.948        | Comparative fit index                    |
| TLI                         | 0.896        | Tucker-Lewis index                       |
| <b>Size of residuals</b>    |              |                                          |
| SRMR                        | 0.044        | Standardized root mean squared residual  |
| CD                          | 0.665        | Coefficient of determination             |
